# Supplementary material
Source: Frontiers journal article supplement (https://www.frontiersin.org/articles/147950)
Supplement: Data_Sheet_1.PDF [file Data_Sheet_1.PDF]

## Supplementary Material:

### Automated quantification of the phagocytosis of *Aspergillus fumigatus* conidia by a novel image analysis algorithm

Kaswara Kraibooj<sup>1,3,†</sup>, Hanno Schoeler<sup>2,3,†</sup>, Carl-Magnus Svensson<sup>1</sup>, Axel A. Brakhage<sup>2,3</sup>  
and Marc Thilo Figge<sup>1,3,\*</sup>

<sup>1</sup>Applied Systems Biology, Leibniz Institute for Natural Product Research and Infection Biology – Hans Knöll Institute (HKI), Jena, Germany

<sup>2</sup>Department of Molecular and Applied Microbiology, Leibniz Institute for Natural Product Research and Infection Biology – Hans Knöll Institute (HKI), Jena, Germany

<sup>3</sup>Friedrich Schiller University Jena, Jena, Germany

<sup>†</sup> These authors contributed equally to this work.

\* **Correspondence:** Marc Thilo Figge, Applied Systems Biology, Leibniz Institute for Natural Product Research and Infection Biology – Hans Knöll Institute, Beutenbergstrasse 11a, 07745 Jena, Germany. e-mail: thilo.figge@hki-jena.de

**Keywords:** *Aspergillus fumigatus*, alveolar macrophages, host-pathogen interaction, phagocytosis assay, automated image analysis.

#### 1 Supplementary Data

**Supplementary Data 1.** Rule-set of the algorithm in the meta-language of the software *Definiens Developer XD*.

Classes:

\_Temp1  
\_Temp2  
\_Temp4  
background  
cluster\_temp  
cluster  
conidia\_adh  
conidia\_nonadh  
conidia\_nonphag  
conidia\_phag  
link\_class\_adh  
link\_mphag-adhC\_NB  
link\_mphage-phagC\_NB  
link\_mphage\_allC\_NB  
link\_mphage\_phagC  
mphages  
nonadhC\_notknown

Process: Main:

ruleset

initialization

Reset

delete image object level: at Mphage\_Level: delete

delete image object level: at Spores\_Level: delete

delete links: mphages, conidia\_phag at Mphage\_Level: delete background,  
mphages, conidia\_phag(all) links to any with class=any

delete links: link\_class\_adh, link\_mphage\_phagC at Mphage\_Level: delete  
background, mphages, conidia\_phag(all) links to any with class=any

delete layer: delete image layer '1\_gaus'

delete layer: delete image layer '1\_gaus\_minmax'

delete layer: delete image layer 'L2\_gaus'

delete layer: delete image layer 'distance map'

delete map: on spores\_map : delete map

delete map: on mphage\_map : delete map

Initialize Variables

update variable: adhC\_NUM\_1 \*= 0

update variable: curr\_round \*= 0

update variable: thresh\_L2 \*= 0

update variable: thresh\_1gaus \*= 0

update variable: adhC\_RATIO\_2 \*= 0

update variable: index2 \*= 0

update variable: adhC\_RATIO\_3 \*= 0

update variable: mphage\_RATIO\_2 \*= 0

update variable: mphage\_RATIO\_3 \*= 0

update variable: mphage\_RATIO\_4 \*= 0

update variable: mphage\_RATIO\_1 \*= 0

update variable: mphage\_NUM\_4 \*= 0

update variable: mphage\_NUM\_3 \*= 0

update variable: associatedC\_NB\_NUM \*= 0

update variable: nonphagC\_NUM\_1 \*= 0

update variable: phagC\_NUM\_1 \*= 0

update variable: mphage\_NUM\_2 \*= 0

update variable: mphage\_Num\_6 \*= 0

update variable: mphage\_NUM\_1 \*= 0

update variable: agg\_NUM \*= 0

update variable: agg\_adh\_RATIO \*= 0

update variable: agg\_nonadh\_RATIO \*= 0

update variable: agg\_adh\_NUM \*= 0

update variable: agg\_nonadh\_NUM \*= 0

update variable: adhC\_RATIO\_1 \*= 0

update variable: adh\_INDEX \*= 0

update variable: agg\_RATIO \*= 0

update variable: phagC\_RATIO\_2 \*= 0

update variable: thresh\_1gaus \*= 0

update variable: initial\_shrink\_thresh \*= 0

update variable: phag\_INDEX \*= 0

```

update variable: phagC_RATIO_3 *= 0
update variable: phagC_RATIO_1 *= 0
update variable: totalC_classi_NUM *= 0
update variable: totalC_seg_NUM *= 0
update variable: phagC_NUM_2 *= 0
update variable: adhC_NUM_2 *= 0
update variable: notknownC_NUM *= 0
update variable: adhConPerMphage_RATIO *= 0
update variable: nonadhC_NUM_1 *= 0
update variable: counter *= 0
update variable: phagC_per_M_DIST *= 0
update variable: uptake_percentage_phag *= 0
update variable: uptake_percentage_adh *= 0
update variable: MOI *= 0
update variable: step_size *= 0
update variable: clust_intens_MIN *= 0
update variable: mphage_NUM_5 *= 0
update variable: curr_init_intens *= 0
update array: update array 'cluster_array': clear
update array: update array 'cluster_non-adh': clear
update array: update array 'cluster_adh': clear

```

#### Parameters

##### Conidia

```

update variable: conidium_area_MIN = 100
update variable: conidium_intensity_MIN = 20
update variable: clust_size_MIN = 275
update variable: conidium_roundness_MAX = 1.2
update variable: conidium_LW_MAX = 2
update variable: C_blue_THR = 40
update variable: step_size = 10
update variable: watershed_C_area_THR = 10
update variable: initial_shrink_thresh = 40

```

##### Mphages

```

update variable: mphage_border_intensity = 80
update variable: watershed_M_area_THR = 50
update variable: mphage_area_MIN = 2400
update variable: mphage_area_MAX = 40000

```

#### pre-processing and segmentation of conidia (\*)

##### create Conidia Map

```

delete map: on spores_map : delete map
copy map: on main : copy map to 'spores_map' with scale 100%
display map: on spores_map : display map 'spores_map'

```

##### pre-processing

```

convolution filter: on spores_map : convolution filter (Gauss Blur, 3 x 3 x 1):

```

'Layer 2' => 'L2\_gaus'

##### thresholding

##### automatic threshold-based segmentation

```

automatic threshold: on spores_map : thresh_L2=auto threshold on L2_gaus

```

```

    update variable: thresh_L2 *= 1.5
    multi-threshold segmentation: on spores_map : creating 'Spores_Level':
unclassified <= thresh_L2 < conidia_phag on L2_gaus
    special cases_filling holes
        find enclosed by class: unclassified at Spores_Level: enclosed by
conidia_phag: conidia_phag +
        assign class: unclassified with Area < conidium_area_MIN and Distance to
scene border = 0 Px1 at Spores_Level: conidia_phag
        merge region: conidia_phag at Spores_Level: merge region
        grow region: _Temp2 at Spores_Level: <- conidia_phag
        assign class: _Temp2 at Spores_Level: conidia_phag
    Iterative segmentation_cell seperation
        initial shrinking
            pixel-based object resizing: loop: on spores_map conidia_phag with Area >=
clust_size_MIN at Spores_Level: shrink using unclassified where Layer
2<=initial_shrink_thresh
        Init
            assign class: on spores_map conidia_phag with Area >= clust_size_MIN at
Spores_Level: _Temp1
        Cell Seperation
            _Temp1 at Spores_Level
            assign class: if _Temp1 : cluster_temp
            update variable: cluster_temp at Spores_Level: clust_intens_MIN = Min.
pixel value Layer 2
            update variable: curr_init_intens = [clust_intens_MIN]
            merge region: cluster_temp at Spores_Level: merge region
            loop: cluster_temp at Spores_Level
                loop: do
                    update variable: curr_init_intens += step_size
                    pixel-based object resizing: loop: cluster_temp at Spores_Level:
shrink using unclassified where Layer 2<=curr_init_intens
                    distance map: cluster_temp at Spores_Level: distance to object
border(distance map)
                    watershed segmentation: cluster_temp at Spores_Level: watershed
segmentation on -distance map with fusion
                    convert image objects: cluster_temp, conidia_phag at Spores_Level:
convert image objects -> Connected 2D
                    assign class: on spores_map cluster_temp with Area <
clust_size_MIN at Spores_Level: conidia_phag
        Clean up
            assign class: conidia_phag with Area < conidium_area_MIN at Spores_Level:
unclassified
            assign class: on spores_map conidia_phag with Mean Layer 2 <=
conidium_intensity_MIN at Spores_Level: unclassified
            assign class: on spores_map conidia_phag with Roundness >=
conidium_roundness_MAX at Spores_Level: unclassified
            assign class: on spores_map conidia_phag with Length\Width >=
conidium_LW_MAX at Spores_Level: unclassified

```

```

merge region: unclassified at Spores_Level: merge region
Quantities
compute statistical value: conidia_phag at Spores_Level: totalC_seg_NUM =
number
nonphag conidia and Phag conidia
assign class: on spores_map conidia_phag with Mean Layer 4 >= 37 at
Spores_Level: conidia_nonphag
compute statistical value: conidia_nonphag at Spores_Level: nonphagC_NUM_1 =
number
compute statistical value: conidia_phag at Spores_Level: phagC_NUM_1 = number
aggregation_non-phag
Specify Clusters
on spores_map cluster, conidia_nonphag with Number of conidia_nonphag (0) >=
1 at Spores_Level
assign class: on spores_map cluster, conidia_nonphag with Rel. border to
conidia_nonphag > 0 at Spores_Level: cluster
Number of nonphagocytosed aggregated conidia
compute statistical value: cluster at Spores_Level: agg_NUM = number
Count Clusters and assign the numbers to array
on spores_map cluster at Spores_Level (*)
assign class: if cluster : cluster_temp
assign class: 10x: on spores_map cluster_temp, cluster with Rel. border to
cluster_temp > 0 at Spores_Level: cluster_temp
compute statistical value: on spores_map cluster_temp at Spores_Level:
counter = number
update array: on spores_map if counter > 1 : update array 'cluster_array': add:
[ counter ]
assign class: on spores_map cluster_temp at Spores_Level: conidia_nonphag
update variable: counter = 0
pre-processing and segmentation of macrophages (*)
Create Mphage Map
delete map: on mphage_map : delete map
copy map: on main : copy map to 'mphage_map'
display map: on mphage_map : display map 'mphage_map'
Preprocessing
convolution filter: convolution filter (Gauss Blur, 25 x 25 x 1): 'Layer 1' =>
'1_gaus'
Segmentation
thresholding
automatic-threshold-based segmentaiton
automatic threshold: on mphage_map : thresh_1gaus=auto threshold on
1_gaus
update variable: on mphage_map : thresh_1gaus *= 0.3
multi-threshold segmentation: on mphage_map : creating 'Mphage_Level':
unclassified <= thresh_1gaus < mphages on 1_gaus
merge in-between background to foreground
find enclosed by class: on mphage_map unclassified at Mphage_Level:
enclosed by mphages: _Temp1 +

```

```

remove objects: _Temp1 at Mphage_Level: remove objects into mphages
(merge by shape)
  assign class: unclassified with Distance to scene border = 0 Pxl and Area
  <= 7000 at Mphage_Level: mphages
  merge region: on mphage_map mphages at Mphage_Level: merge region
  watershed segmentation
  watershed segmentation
  pixel min/max filter (prototype): on mphage_map mphages at
Mphage_Level: pixel min\max filter (prototype) (3 x 1; Diff. center to darkest ): 'Layer 1' =>
'1_gaus_minmax'
  convolution filter: on mphage_map mphages at Mphage_Level:
convolution filter (Gauss Blur, 49 x 49 x 1): '1_gaus_minmax' => '1_gaus'
  watershed segmentation: on mphage_map mphages at Mphage_Level:
watershed segmentation on 1_gaus with fusion
  convert image objects: mphages at Mphage_Level: convert image objects -
> Connected 2D
  merge thresholding-background with watershed background
  assign class: on mphage_map mphages with Border to unclassified > 0 Pxl
at Mphage_Level: _Temp1
  assign class: on mphage_map _Temp1 at Mphage_Level: unclassified
  merge region: on mphage_map unclassified at Mphage_Level: merge
region
  classifiers
  border classifier
  assign class: on mphage_map mphages with Distance to scene border = 0
Pxl at Mphage_Level: _Temp4
  assign class: on mphage_map _Temp4 with Mean Layer 4 <= 5 and Mean
Layer 1 <= 20 at Mphage_Level: unclassified
  assign class: on mphage_map _Temp4 with Area >= mphage_area_MAX at
Mphage_Level: unclassified
  assign class: on mphage_map _Temp4 with Mean Layer 4 <= 1 at
Mphage_Level: unclassified
  assign class: on mphage_map _Temp4 with Roundness >= 0.8 and Shape
index >= 1.8 at Mphage_Level: unclassified
  assign class: on mphage_map _Temp4 with Roundness >= 1 at
Mphage_Level: unclassified
  assign class: on mphage_map _Temp4 with Mean Layer 1 <= 65 at
Mphage_Level: _Temp1
  assign class: on mphage_map _Temp1 with Roundness >= 0.65 and Shape
index >= 1.2 at Mphage_Level: unclassified
  assign class: on mphage_map _Temp1 with Roundness >= 0.6 and Shape
index >= 1.41 at Mphage_Level: unclassified
  assign class: on mphage_map _Temp1, _Temp4 at Mphage_Level:
mphages
  inside classifier
  assign class: on mphage_map mphages with Distance to scene border > 0
Pxl at Mphage_Level: _Temp4
  assign class: on mphage_map _Temp4 with Area >= mphage_area_MAX at

```

```

Mphage_Level: unclassified
    assign class: on mphage_map _Temp4 with Mean Layer 4 <= 1 at
Mphage_Level: unclassified
    assign class: on mphage_map _Temp4 with Mean Layer 4 <= 5 and Mean
Layer 1 <= 20 at Mphage_Level: unclassified
    assign class: on mphage_map _Temp4 with Mean Layer 4 <= 2 and Mean
Layer 1 <= 42 at Mphage_Level: unclassified
    assign class: on mphage_map _Temp4 with Mean Layer 4 <= 5 and Shape
index >= 1.4 at Mphage_Level: unclassified
    assign class: on mphage_map _Temp4 with Mean Layer 4 <= 4 and Shape
index >= 1.28 at Mphage_Level: unclassified
    assign class: on mphage_map _Temp4 with Mean Layer 4 <= 3 and
Roundness >= 0.55 at Mphage_Level: unclassified
    assign class: on mphage_map _Temp4 with Roundness >= 0.51 and Shape
index >= 1.4 at Mphage_Level: unclassified
    assign class: on mphage_map _Temp4 with Roundness >= 0.6 and Shape
index >= 1.3 at Mphage_Level: unclassified
    assign class: on mphage_map _Temp4 with Roundness >= 0.73 and Shape
index >= 1.57 at Mphage_Level: unclassified
    assign class: on mphage_map _Temp4 with Roundness >= 0.72 and Shape
index >= 1.47 at Mphage_Level: unclassified
    assign class: on mphage_map _Temp4 at Mphage_Level: mphages
    Smoothing The Borders of Macrophages
    pixel-based object resizing: 2x: mphages at Mphage_Level: grow into all where
Layer 1>=10
    chessboard segmentation: on mphage_map unclassified at Mphage_Level: chess
board: 1
    on mphage_map mphages at Mphage_Level
    update variable: if mphages : curr_round = [Roundness]+0.01
    grow region: on mphage_map mphages with Roundness <= curr_round at
Mphage_Level: <- unclassified Mean Layer 1 ratio PPO (0) >= 0.7 (*)
    cleanup
    merge region: on mphage_map unclassified at Mphage_Level: merge region
    assign class: on mphage_map mphages with Area <= mphage_area_MIN and
Distance to scene border > 0 Pxl at Mphage_Level: unclassified
    assign class: on mphage_map unclassified at Mphage_Level: background
    find enclosed by class: on mphage_map background, unclassified at
Mphage_Level: enclosed by mphages: _Temp1 +
    remove objects: on mphage_map _Temp1 at Mphage_Level: remove objects into
mphages (merge by shape)
    merge region: on mphage_map background at Mphage_Level: merge region
    linking
    create links: on mphage_map mphages with Distance to scene border > 0 Pxl at
Mphage_Level: *link link_mphage_allC_NB to any if class=conidia_nonphag, conidia_phag,
shift=0x0x0x0, overlap>=0%
    create links: on mphage_map mphages at Mphage_Level: *link
link_mphage_phagC to any if class=conidia_phag, shift=0x0x0x0, overlap>=0%
    create links: on mphage_map mphages with Distance to scene border > 0 Pxl at

```



```

Mphage_Level: *link link_mphage-phagC_NB to any if class=conidia_phag, shift=0x0x0x0,
overlap>=0%
    create links: on mphage_map mphages at Mphage_Level: *link link_class_adh to
any if class=conidia_nonphag, shift=0x0x0x0, overlap>=0%
    create links: on mphage_map mphages with Distance to scene border > 0 Px1 at
Mphage_Level: *link link_mphage-adhC_NB to any if class=conidia_nonphag,
shift=0x0x0x0, overlap>=0%
    update variable: on mphage_map mphages at Mphage_Level:
adh_per_mphage_noborder = Number of linked objects Number of Linked via
link_class_adh(all) within dist=999999, excl. current object
    update variable: on mphage_map mphages at Mphage_Level:
phag_per_mphage_pos_noborder = Number of linked objects Number of Linked via
link_mphage_phagC(all) within dist=999999, excl. current object
    adh, non-adh&non-known
    assign class: on spores_map conidia_nonphag with Number of linked objects
Number of Linked via link_class_adh(all) within dist=999999, excl. current object = 0 at
Spores_Level: conidia_nonadh
    assign class: on spores_map conidia_nonphag at Spores_Level: conidia_adh
    assign class: on spores_map conidia_nonadh with Distance to scene border = 0 Px1 at
Spores_Level: nonadhC_notknown
    aggregation
    Aggregation ratio of all non-phag spores
    [on mphage_map conidia_nonphag at Mphage_Level]
        update variable: conidia_nonphag neighbour image object: agg_NUM += 1
        update variable: agg_RATIO = ([agg_NUM]\[nonphagC_NUM_1])*100
        update variable: agg_RATIO = ([agg_NUM]\[nonphagC_NUM_1])*100
    clusters_adh
    init
        update variable: counter = 0
        assign class: on spores_map cluster at Spores_Level: cluster_temp
    Specify Clusters
        on spores_map cluster, conidia_adh with Number of conidia_adh (0) >= 1 at
Spores_Level
            assign class: on spores_map cluster, conidia_adh with Rel. border to
conidia_adh > 0 at Spores_Level: cluster
            Number of nonphagocytosed aggregated conidia
            compute statistical value: cluster at Spores_Level: agg_adh_NUM = number
Count Clusters and assign the numbers to array
            on spores_map cluster at Spores_Level
                assign class: if cluster : cluster_temp
                assign class: 10x: on spores_map cluster_temp, cluster with Rel. border to
cluster_temp > 0 at Spores_Level: cluster_temp
                compute statistical value: on spores_map cluster_temp at Spores_Level:
counter = number
                update array: if counter > 1 : update array 'cluster_adh': add: [ counter ]
                assign class: on spores_map cluster_temp at Spores_Level: conidia_adh
                update variable: counter = 0
    clusters_nonadh

```



```

init
  update variable: counter = 0
  assign class: cluster at Spores_Level: cluster_temp
Specify Clusters
  on spores_map cluster, conidia_nonadh with Number of conidia_nonadh (0)
  >= 1 at Spores_Level
    assign class: on spores_map cluster, conidia_nonadh with Rel. border to
    conidia_nonadh > 0 at Spores_Level: cluster
    Number of nonphagocytosed aggregated conidia
    compute statistical value: cluster at Spores_Level: agg_nonadh_NUM =
number
  Count Clusters and assign the numbers to array
  on spores_map cluster at Spores_Level
    assign class: if cluster : cluster_temp
    assign class: 10x: on spores_map cluster_temp, cluster with Rel. border to
    cluster_temp > 0 at Spores_Level: cluster_temp
    compute statistical value: on spores_map cluster_temp at Spores_Level:
counter = number
    update array: on spores_map if counter > 1 : update array 'cluster_non-
adh': add: [ counter ]
    assign class: on spores_map cluster_temp at Spores_Level:
conidia_nonadh
    update variable: on spores_map : counter = 0
Quantities
  with borders' Mphages
  Numbers
    total number of conidia
    update variable: totalC_classi_NUM =
[phagC_NUM_1]+[nonphagC_NUM_1]
    total number of mphages
    compute statistical value: on mphage_map mphages at Mphage_Level:
mphage_NUM_1 = number
    number of phagozytosed spores including borders' Mphage
    compute statistical value: on spores_map conidia_phag at Spores_Level:
phagC_NUM_1 = number
    number of adherent conidia including borders
    compute statistical value: on spores_map conidia_adh at Spores_Level:
adhC_NUM_1 = number
    number of non-adherent conidia excluding borders' ones
    compute statistical value: on spores_map conidia_nonadh with Distance to
scene border > 0 Px1 at Spores_Level: nonadhC_NUM_1 = number
Ratios
  Phagocytosis ratio by color including borders
  update variable: on spores_map : phagC_RATIO_1 =
([phagC_NUM_1])/([phagC_NUM_1]+[adhC_NUM_1])*100
  Phagocytosis ratio by color including borders (to all spores)
  update variable: on spores_map : phagC_RATIO_3 =
[phagC_NUM_1]/([phagC_NUM_1]+[nonphagC_NUM_1])*100

```

```

    Adhesion ratio including borders
    update variable: adhC_RATIO_1 =
([adhC_NUM_1]\([nonphagC_NUM_1]))*100
    Adhesion ratio including borders (to phagocytosed)
    update variable: adhC_RATIO_2 =
([adhC_NUM_1]\([adhC_NUM_1]+[phagC_NUM_1]))*100
    Adhesion_aggregation
    Aggregation ratio_adherent
    update variable: on spores_map : agg_adh_RATIO =
([agg_adh_NUM]\([nonphagC_NUM_1]))*100
    Non-adhesion_aggregation
    Aggregation ratio_non-adherent
    update variable: on mphage_map : agg_nonadh_RATIO =
([agg_nonadh_NUM]\([nonphagC_NUM_1]))*100
    without borders' Mphages
    Numbers
    Number of all adherent conidia excluding borders' mphages, by position
    compute statistical value: on spores_map conidia_adh with Number of
linked objects Number of Linked via link_mphag-adhC_NB(all) within dist=999999, excl.
current object > 0 at Spores_Level: adhC_NUM_2 = number
    Number of all phagocytosed conidia excluding borders' mphages, by position
    compute statistical value: on spores_map conidia_phag with Number of
linked objects Number of Linked via link_mphage-phagC_NB(all) within dist=999999, excl.
current object > 0 at Spores_Level: phagC_NUM_2 = number
    Number of Mphages excluding borders
    compute statistical value: on mphage_map mphages with Distance to scene
border > 0 Pxl at Mphage_Level: mphage_NUM_2 = number
    Number of macrophages having no associated conidia (excluding border's
macrophages)
    compute statistical value: on mphage_map mphages with Number of linked
objects Number of Linked via link_mphage_allC_NB(all) within dist=999999, excl. current
object = 0 at Mphage_Level: mphage_NUM_5 = number
    Number of macrophages -excluding borders- with at least one conidium
associated
    update variable: mphage_Num_6 = [mphage_NUM_2]-[mphage_NUM_5]
    SUM (adh+phag)
    update variable: associatedC_NB_NUM =
[adhC_NUM_2]+[phagC_NUM_2]
    Ratio
    Phag ratio by position
    update variable: phagC_RATIO_2 =
([phagC_NUM_2]\([phagC_NUM_2]+[adhC_NUM_2]))*100
    Phagocytosis Index
    compute statistical value: mphages with Number of linked objects Number
of Linked via link_mphage-phagC_NB(all) within dist=999999, excl. current object > 0 at
Mphage_Level: mphage_NUM_3 = number
    update variable: phagC_per_M_DIST =
[phagC_NUM_2]\[mphage_NUM_2]

```

```

        update variable: uptake_percentage_phag =
[mpbage_NUM_3]\[mpbage_NUM_2]
        update variable: phag_INDEX =
[phagC_per_M_DIST]*[uptake_percentage_phag]
        Adhesion Index
        compute statistical value: mphages with Number of linked objects Number
of Linked via link_mphag-adhC_NB(all) within dist=999999, excl. current object > 0 at
Mphage_Level: mpbage_NUM_4 = number
        update variable: adhConPerMphage_RATIO =
[adhC_NUM_2]\[mpbage_NUM_2]
        update variable: uptake_percentage_adh =
[mpbage_NUM_4]\[mpbage_NUM_2]
        update variable: adh_INDEX =
[uptake_percentage_adh]*[adhConPerMphage_RATIO]
        Adh ratio_adhTOphag_only detected
        update variable: adhC_RATIO_3 =
([adhC_NUM_2]\([adhC_NUM_2]+[phagC_NUM_2]))*100
        phagocytosing mphages Ratio
        update variable: on Active Map : mphage_RATIO_1 =
([mpbage_NUM_3]\[mpbage_NUM_2])*100
        update variable: mphage_RATIO_2 =
([mpbage_NUM_4]\[mpbage_NUM_2])*100
        update variable: mphage_RATIO_3 =
([mpbage_Num_6]\[mpbage_NUM_2])*100
        update variable: mphage_RATIO_4 =
([mpbage_NUM_5]\[mpbage_NUM_2])*100
        Non-adherent Conidia_notknown
        compute statistical value: on spores_map nonadhC_notknown at Spores_Level:
notknownC_NUM = number
        update variable: MOI = [totalC_seg_NUM]\[mpbage_NUM_1]
        update variable: index2 = [phagC_RATIO_2]*[mphage_RATIO_1]
    My Export
        assign class: on mphage_map mphages with Distance to scene border = 0 Pxl at
Mphage_Level: _Temp1
        export object statistics: on mphage_map mphages with Distance to scene border > 0
Pxl at Mphage_Level: export object statistics
        export object statistics: on mphage_map conidia_adh, conidia_nonadh, conidia_phag
at Mphage_Level: export object statistics
        export object statistics: on mphage_map conidia_adh, conidia_nonadh, conidia_phag
with Distance to scene border > 0 Pxl at Mphage_Level: export object statistics
        export project statistics: on mphage_map : export project statistics
        export project statistics: on mphage_map : export project statistics
        export project statistics: on mphage_map : export project statistics
        export project statistics: on mphage_map : export project statistics
        export project statistics: on mphage_map : export project statistics
        export project statistics: on mphage_map : export project statistics
        export project statistics: on main : export project statistics
        export project statistics: on main : export project statistics

```

```
export project statistics: on main : export project statistics
assign class: _Temp1 at Mphage_Level: mphages
Visualization_synchronizing both maps to mphage map
synchronize map: on spores_map conidia_adh, conidia_nonadh, conidia_phag,
nonadhC_notknown at Spores_Level: synchronize map 'mphage_map'
display map: on mphage_map : display map 'mphage_map'
convert image objects: on mphage_map mphages, conidia_phag at Mphage_Level:
convert image objects -> Connected 2D
merge region: background at Mphage_Level: merge region
```
